# Supplementary material for: Sequencing-based fine-mapping and in silico functional characterization of the 10q24.32 arsenic metabolism efficiency locus across multiple arsenic-exposed populations
Source: PLOS journal article supplement (doi:10.1371/journal.pgen.1010588), 2023-01-20
Supplement: S3 (10.1371/journal.pgen.1010588.s003) [file redirect.do]

**Fig S2** Distribution of urinary DMA percent across cohorts

**A. HEALS DMA% Distribution**

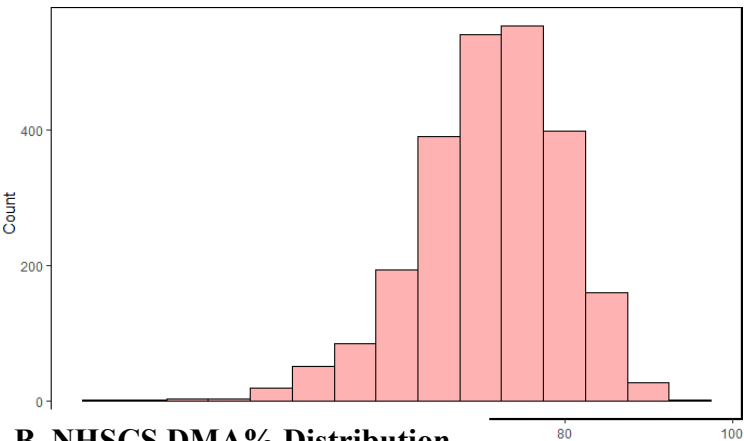

**B. NHSCS DMA% Distribution**

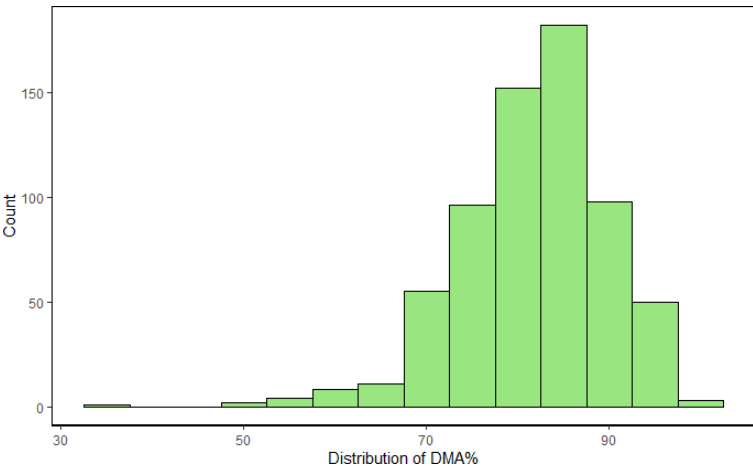

**C. SHS DMA% Distribution**

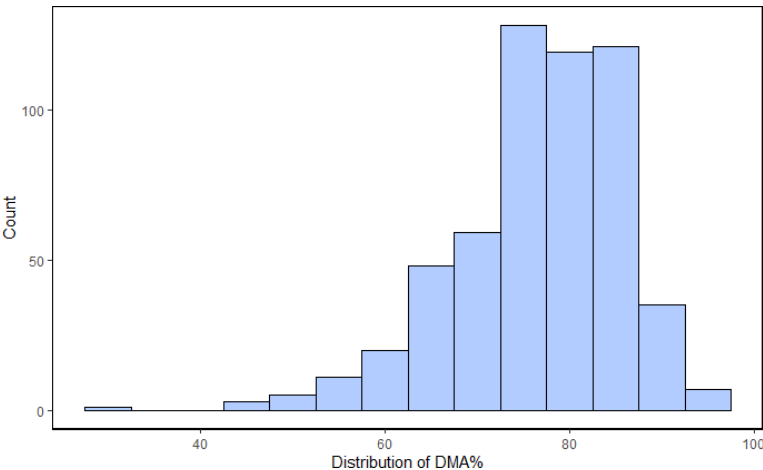

**Fig S2.** Distribution of urinary DMA percent across cohorts  
DMA% distribution in three arsenic-exposed populations. The Health Effect of Arsenic Longitudinal Study (HEALS, in red), the New Hampshire Skin Cancer Study (NHSCS, in green), and the Strong Heart Study (SHS, in blue).
